# Supplementary material for: A Survey of Jellyfish Sting Knowledge among Naval Personnel in Northeast China
Source: MDPI journal article supplement (doi:10.3390/ijerph13070725), 2016-07-19
Supplement: s1 [file s1]

# Supplementary Materials: Survey of Jellyfish Sting Knowledge among Naval Personnel in Northeast China

Ting Kan, Li Gui, Wenwen Shi, Yan Huang, Shuang Li and Chen Qiu

## Jellyfish Envenomation Knowledge Questionnaire

We are conducting a survey regarding naval personnel's knowledge about jellyfish envenomation. We ask if you could please spend 10 min to help fill out this questionnaire. The information you provide is completely confidential and will be only used for academic research. Therefore, your participation and the truthful answers based on your own condition are important for us. Thank you for the support.

**Table S1.** Socio-demographic information.

| No.   | Questions-Stems                                                  | Options/Answers                                                                                                                                                                                                                                  |
|-------|------------------------------------------------------------------|--------------------------------------------------------------------------------------------------------------------------------------------------------------------------------------------------------------------------------------------------|
| A.1.  | What is your gender?                                             | <input type="checkbox"/> Male <input type="checkbox"/> Female                                                                                                                                                                                    |
| A.2.  | How old are you?                                                 | _____                                                                                                                                                                                                                                            |
| A.3.  | What is your nationality?                                        | _____                                                                                                                                                                                                                                            |
| A.4.  | How many years on duty?                                          | _____                                                                                                                                                                                                                                            |
| A.5.  | What is your unit?                                               | _____                                                                                                                                                                                                                                            |
| A.6.  | What is your military rank?                                      | _____                                                                                                                                                                                                                                            |
| A.7.  | What is your post of duty?                                       | _____                                                                                                                                                                                                                                            |
| A.8.  | What is the highest education level that you have obtained?      | <input type="checkbox"/> Bachelor's degree or above <input type="checkbox"/> College degree <input type="checkbox"/> Vocational degree <input type="checkbox"/> High school diploma <input type="checkbox"/> Junior high school diploma or below |
| A.9.  | Have you ever worked in medical or healthcare filed?             | <input type="checkbox"/> Yes <input type="checkbox"/> No                                                                                                                                                                                         |
| A.10. | Is there any medical staff in your family, relatives or friends? | <input type="checkbox"/> Yes <input type="checkbox"/> No                                                                                                                                                                                         |

**Table S2.** Knowledge about jellyfish envenomation.

| No.    | Questions-Stems                                                                                                                                                                    | Options/Answers                                                                                                                                                                                                                                                                                                                                                            |
|--------|------------------------------------------------------------------------------------------------------------------------------------------------------------------------------------|----------------------------------------------------------------------------------------------------------------------------------------------------------------------------------------------------------------------------------------------------------------------------------------------------------------------------------------------------------------------------|
| B.1.   | How would you rate your knowledge about treatment measures for jellyfish sting?                                                                                                    | <input type="checkbox"/> 5-expert <input type="checkbox"/> 4-High <input type="checkbox"/> 3-Moderate <input type="checkbox"/> 2-Low <input type="checkbox"/> 1-None (If you choose "none", please skip to B.3.)                                                                                                                                                           |
| B.2.   | Where did you obtain the knowledge about jellyfish sting?                                                                                                                          | <input type="checkbox"/> Military medical education <input type="checkbox"/> Television <input type="checkbox"/> Books/Magazines/Newspapers <input type="checkbox"/> Internet <input type="checkbox"/> Families/Friends <input type="checkbox"/> Others: _____                                                                                                             |
| B.3.   | Have you or your companions ever experienced jellyfish sting?                                                                                                                      | <input type="checkbox"/> Yes (Number of times: _____) <input type="checkbox"/> No (If you choose "no", please skip to B.5.)                                                                                                                                                                                                                                                |
| B.4.   | What was your first reaction when you or your companions suffered jellyfish sting?                                                                                                 | <input type="checkbox"/> Too nervous to do anything <input type="checkbox"/> Call for surgeon or medical corpsmen <input type="checkbox"/> Take simple interventions immediately                                                                                                                                                                                           |
| B.5.   | Which part of jellyfish would cause envenomation?                                                                                                                                  | <input type="checkbox"/> Body <input type="checkbox"/> Tentacles <input type="checkbox"/> Oral arms                                                                                                                                                                                                                                                                        |
| B.6.   | What are the symptoms of mild envenomation? (You can tick more than one option)                                                                                                    | <input type="checkbox"/> Local Itching <input type="checkbox"/> Burning pain <input type="checkbox"/> Hoarseness <input type="checkbox"/> Chest distress <input type="checkbox"/> Pallor                                                                                                                                                                                   |
| B.7.   | What would you do with the wound if someone suffered jellyfish sting?                                                                                                              | <input type="checkbox"/> Go ashore and clean with sea water <input type="checkbox"/> Go ashore and clean with fresh water                                                                                                                                                                                                                                                  |
| B.8.   | After jellyfish sting, which of the following situations indicates the patient should be sent to hospital immediately to prevent exacerbation? (You can tick more than one option) | <input type="checkbox"/> Older than 65 years <input type="checkbox"/> Obesity <input type="checkbox"/> Allergic constitution <input type="checkbox"/> Having a cold <input type="checkbox"/> Cardiac diseases history <input type="checkbox"/> Large stung area <input type="checkbox"/> Body temperature $\geq 38^{\circ}\text{C}$ <input type="checkbox"/> Local Itching |
| B.9.1. | Jellyfish could cause envenomation even if they are separated or dead.                                                                                                             | <input type="checkbox"/> True <input type="checkbox"/> False                                                                                                                                                                                                                                                                                                               |
| B.9.2. | Jellyfish would not attack people actively unless they are provoked.                                                                                                               | <input type="checkbox"/> True <input type="checkbox"/> False                                                                                                                                                                                                                                                                                                               |

|       |                                                                                                                                              |                                                                                                                                                                                                                                                                                                                             |
|-------|----------------------------------------------------------------------------------------------------------------------------------------------|-----------------------------------------------------------------------------------------------------------------------------------------------------------------------------------------------------------------------------------------------------------------------------------------------------------------------------|
| B.9.3 | The nematocyst that remained in skin should be pulled out with bare hands.                                                                   | <input type="checkbox"/> True <input type="checkbox"/> False                                                                                                                                                                                                                                                                |
| B.10. | Which of the following are high-incidence periods of jellyfish sting? (You can tick more than one option)                                    | <input type="checkbox"/> Noontime <input type="checkbox"/> Nighttime <input type="checkbox"/> After the rain<br><input type="checkbox"/> July and August in summer<br><input type="checkbox"/> March and April in spring                                                                                                    |
| B.11. | Please list measures that could prevent jellyfish envenomation as many as possible. (Such as setting up warning signs in sea training sites) | _____<br>_____<br>_____                                                                                                                                                                                                                                                                                                     |
| B.12. | Which of the following bites or envenomation are common in your unit?                                                                        | <input type="checkbox"/> Sea snakes <input type="checkbox"/> Spiders <input type="checkbox"/> Mosquitoes<br><input type="checkbox"/> Scorpions <input type="checkbox"/> Bees <input type="checkbox"/> Centipedes<br><input type="checkbox"/> Jellyfish <input type="checkbox"/> Dogs <input type="checkbox"/> Others: _____ |

Thank you very much for your help in completing this questionnaire!

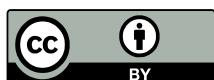

© 2016 by the authors; licensee MDPI, Basel, Switzerland. This article is an open access article distributed under the terms and conditions of the Creative Commons by Attribution (CC-BY) license (<http://creativecommons.org/licenses/by/4.0/>).
